# Supplementary material for: Ratiometric oxygen sensors of cyclometalated iridium(iii) with enhanced quantum yields and variable dynamic ranges
Source: Royal Society of Chemistry journal article supplement (doi:10.1039/d3dt00350g), 2023-01-01
Supplement: d3dt00350g1.pdf [file d3dt00350g1.pdf]

Electronic Supplementary Information for

**Ratiometric Oxygen Sensors of Cyclometalated Iridium(III) with Enhanced Quantum Yields and Variable Dynamic Ranges**

Gregory D. Sutton, Chenggang Jiang, Gardenia Liu, and Thomas S. Teets\*

*Department of Chemistry, University of Houston,  
3585 Cullen Blvd. Room 112, Houston, TX 77204-5003, USA  
email: tteets@uh.edu*

| <i>Index</i>                                                                           | <i>Page</i> |
|----------------------------------------------------------------------------------------|-------------|
| NMR spectra of all new complexes                                                       | S2–S12      |
| High resolution mass spectrometric analysis of all new complexes                       | S13–S15     |
| X-ray crystallography data for complexes <b>btp-py</b> and <b>btp-B</b> .              | S16–S17     |
| Photophysical data of free fluorophores and pyridine-terminate iridium model complexes | S18–S20     |
| Overlaid UV-vis absorption and excitation spectra of iridium-coumarin complexes        | S21–S22     |
| Additional oxygen-sensing data                                                         | S23–S25     |
| ESI References                                                                         | S26         |

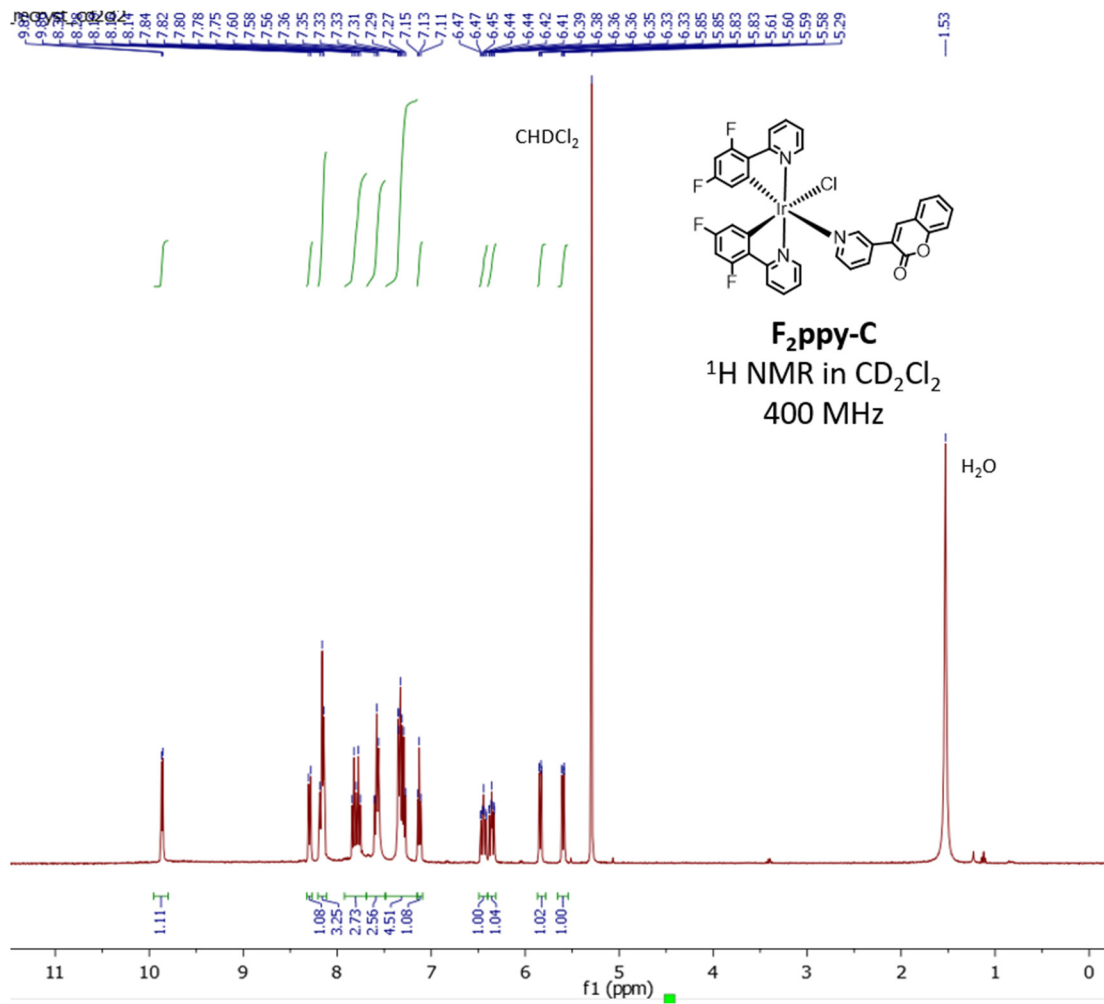

**Fig. S1.**  $^1\text{H}$  NMR spectrum of complex **F<sub>2</sub>ppy-C** recorded at 400 MHz in  $\text{CD}_2\text{Cl}_2$ .

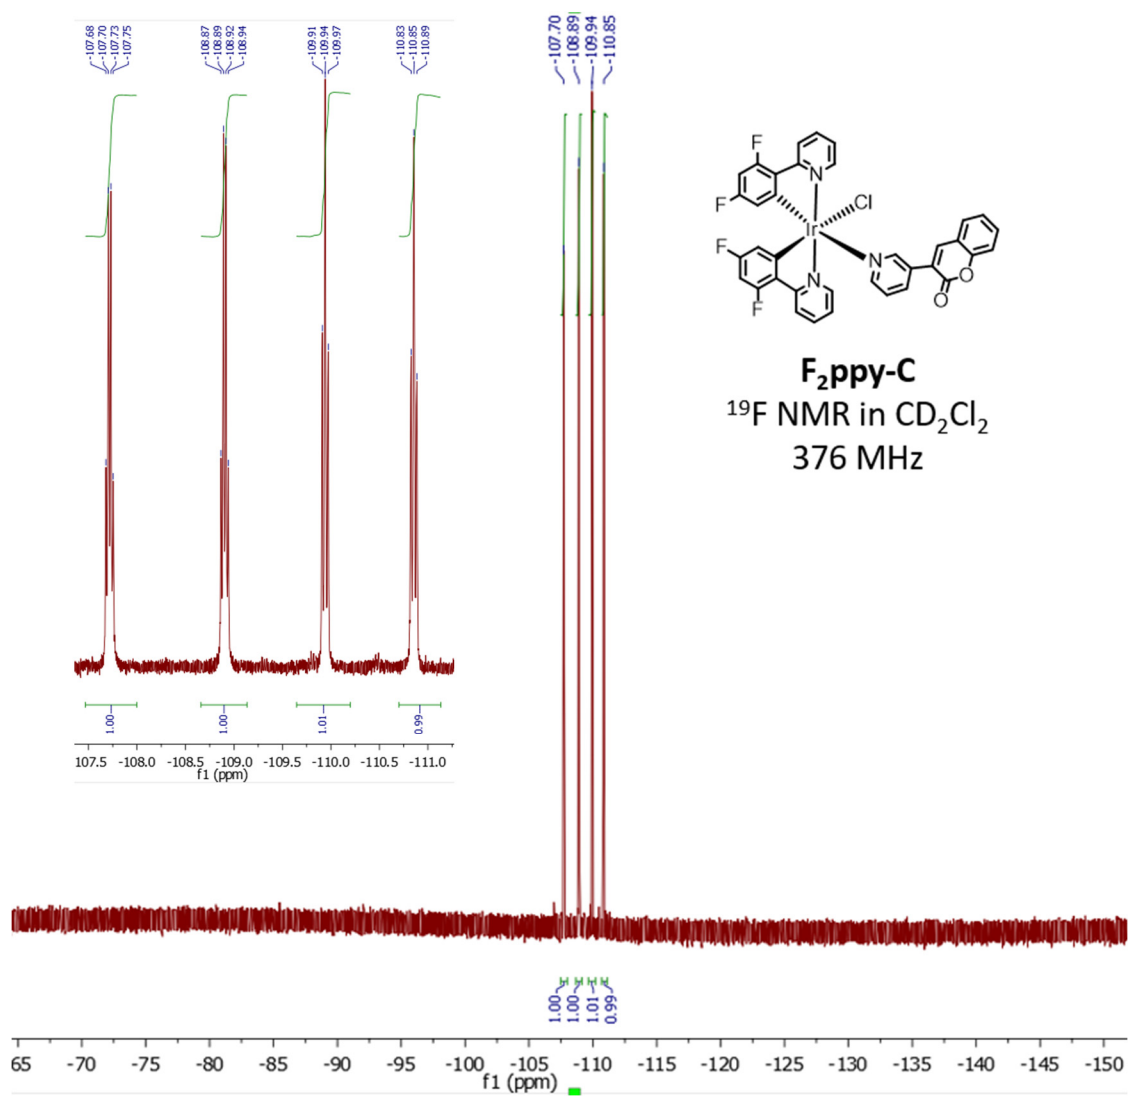

Fig. S2. <sup>19</sup>F NMR spectrum of F<sub>2</sub>ppy-C recorded at 376 MHz in CD<sub>2</sub>Cl<sub>2</sub>.

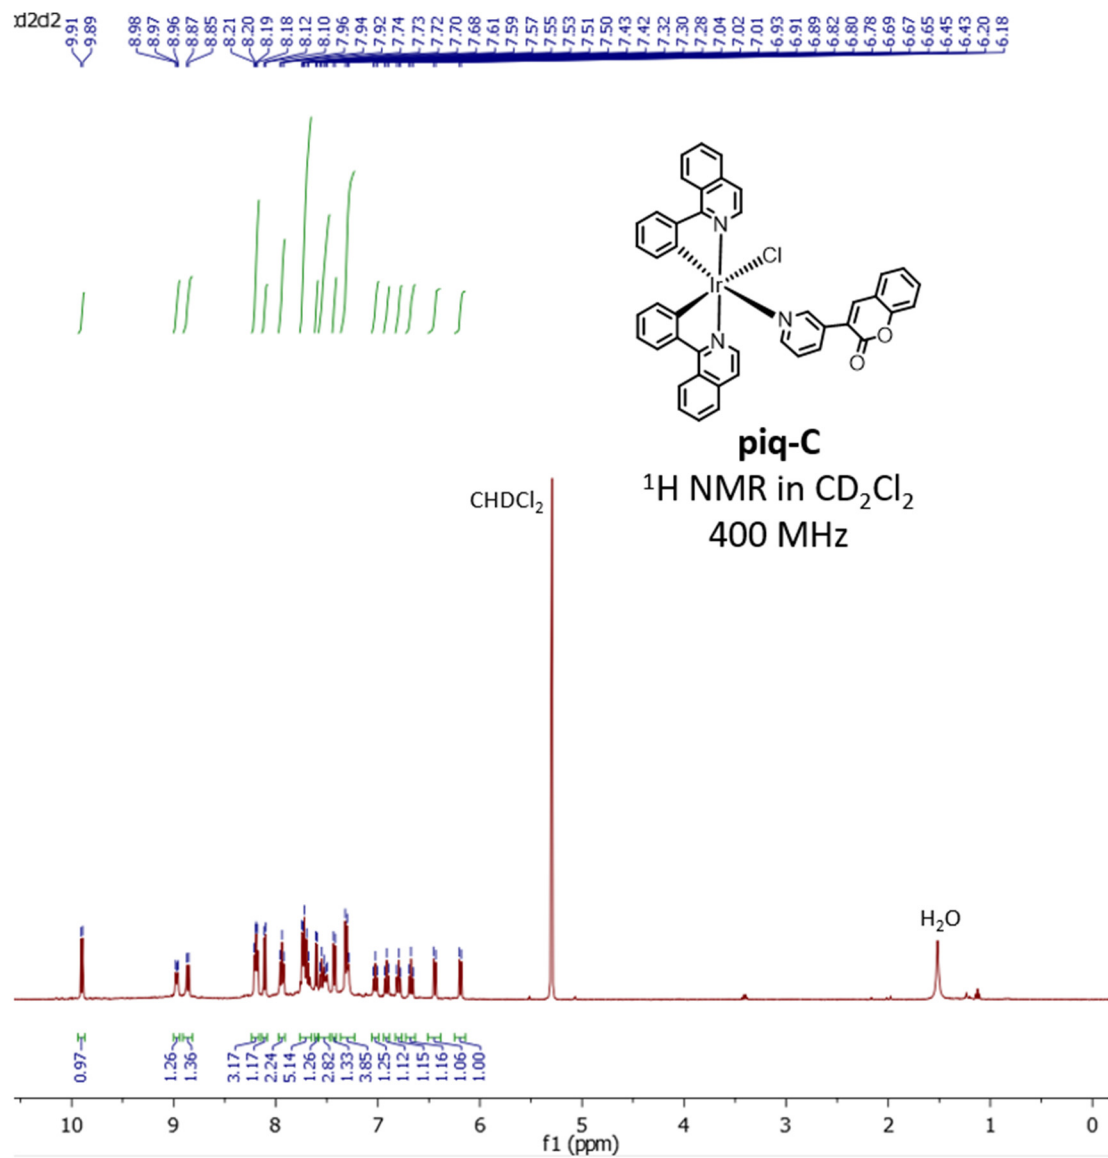

**Fig. S3.** <sup>1</sup>H NMR spectrum of **piq-C** recorded at 400 MHz in CD<sub>2</sub>Cl<sub>2</sub>.

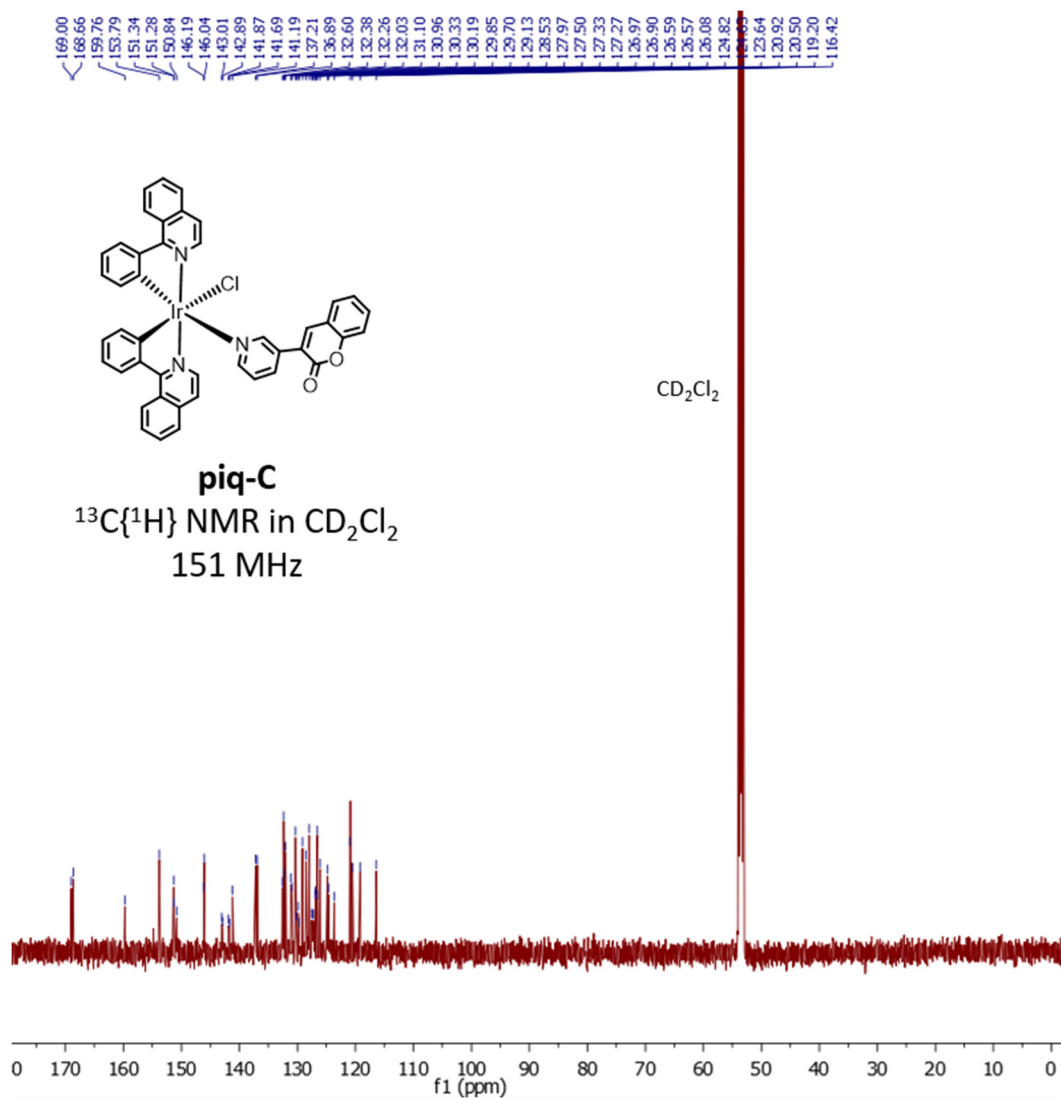

**Fig. S4.**  $^{13}\text{C}\{^1\text{H}\}$  NMR spectrum of **piq-C** recorded at 151 MHz in  $\text{CD}_2\text{Cl}_2$ .

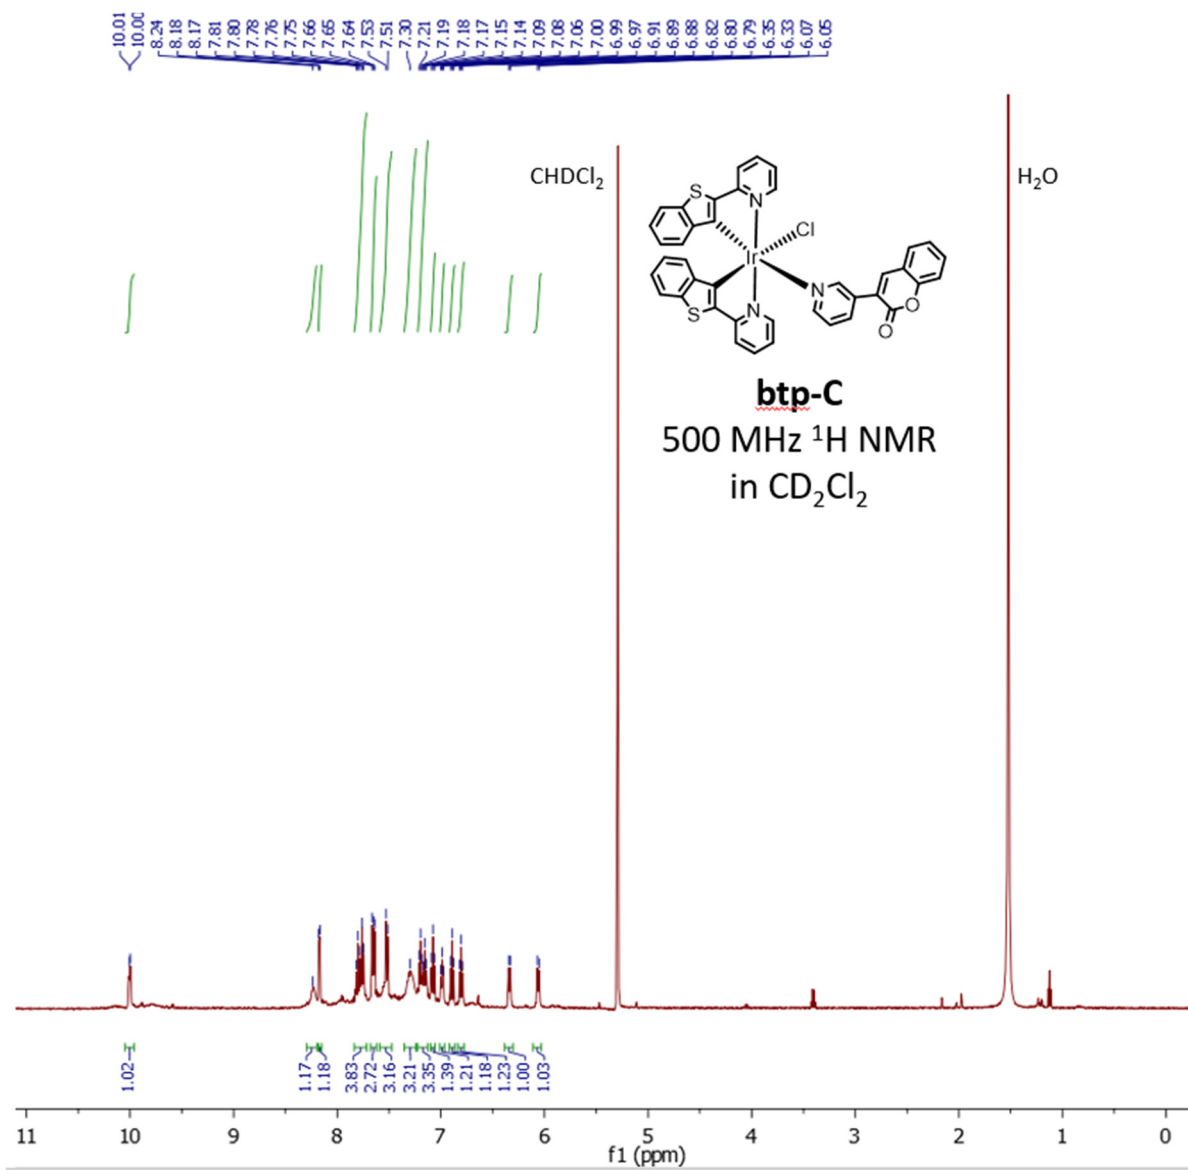

Fig. S5.  $^1\text{H}$  NMR spectrum of **btp-C** recorded at 500 MHz in  $\text{CD}_2\text{Cl}_2$ .

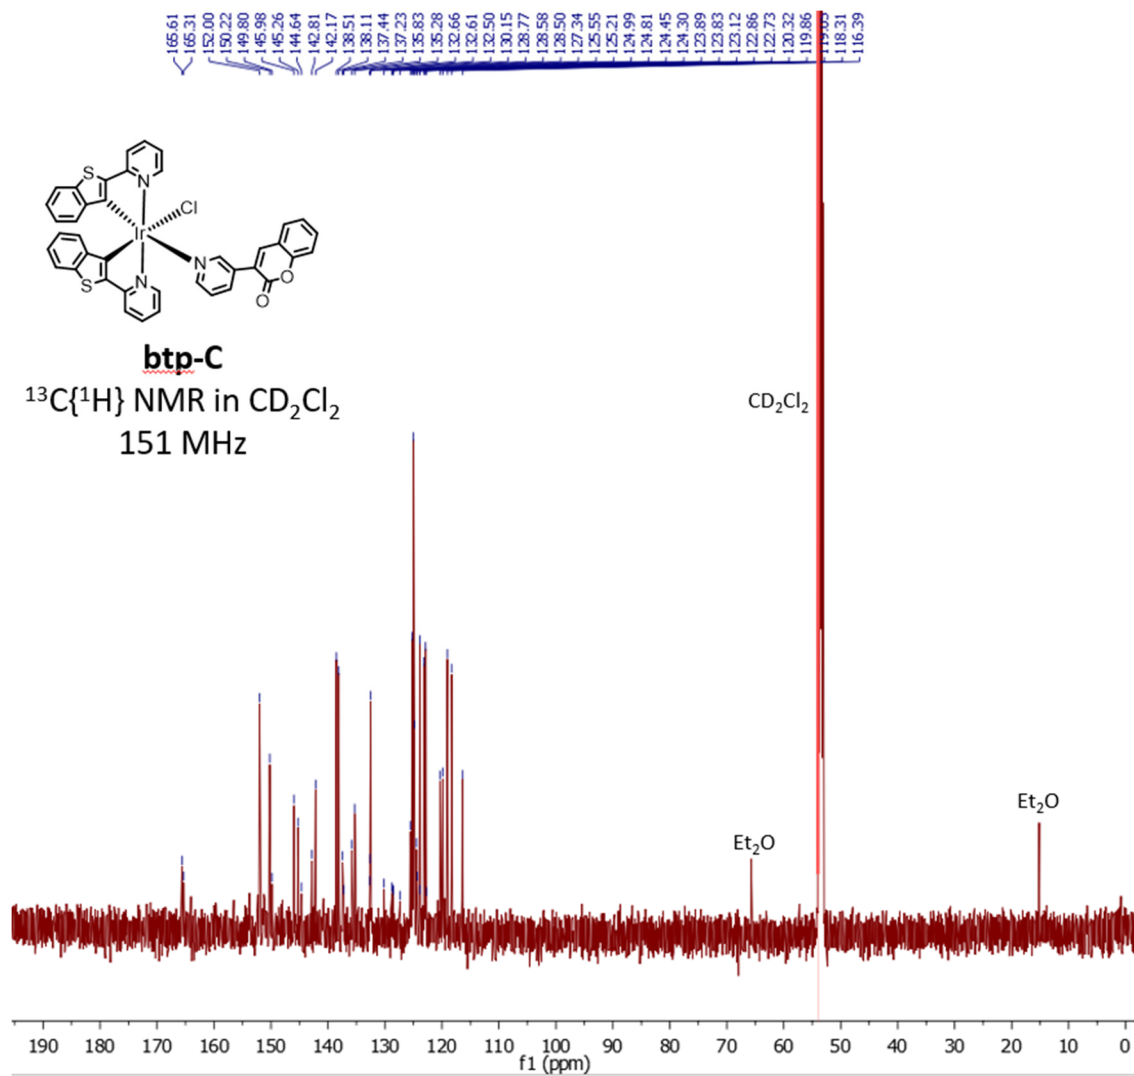

**Fig. S6.**  $^{13}\text{C}\{^1\text{H}\}$  NMR spectrum of **btp-C** recorded at 151 MHz in  $\text{CD}_2\text{Cl}_2$ .

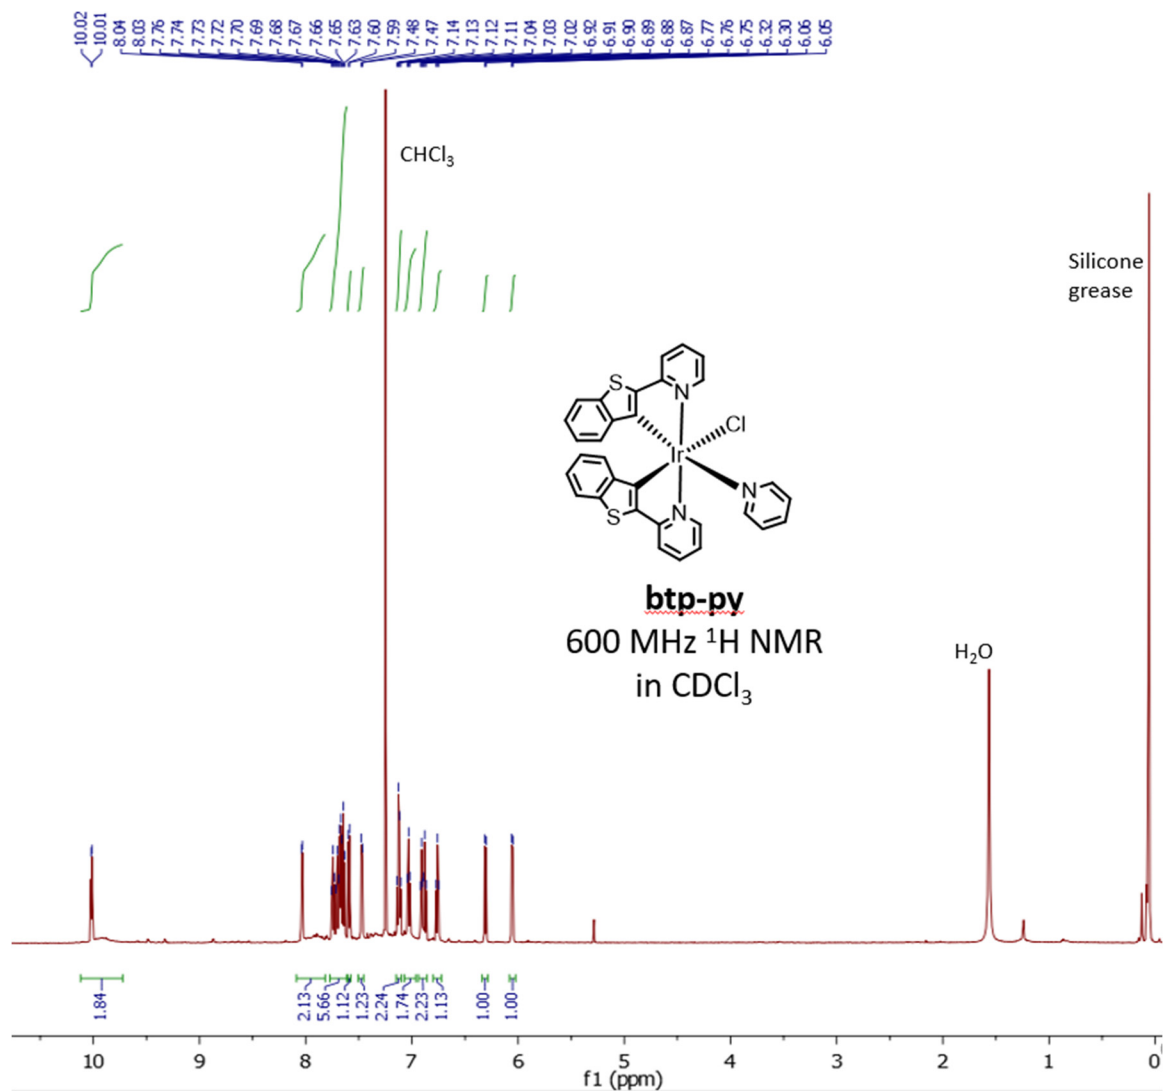

**Fig. S7.**  $^1\text{H}$  NMR spectrum of **btp-py** recorded at 600 MHz in  $\text{CDCl}_3$ .



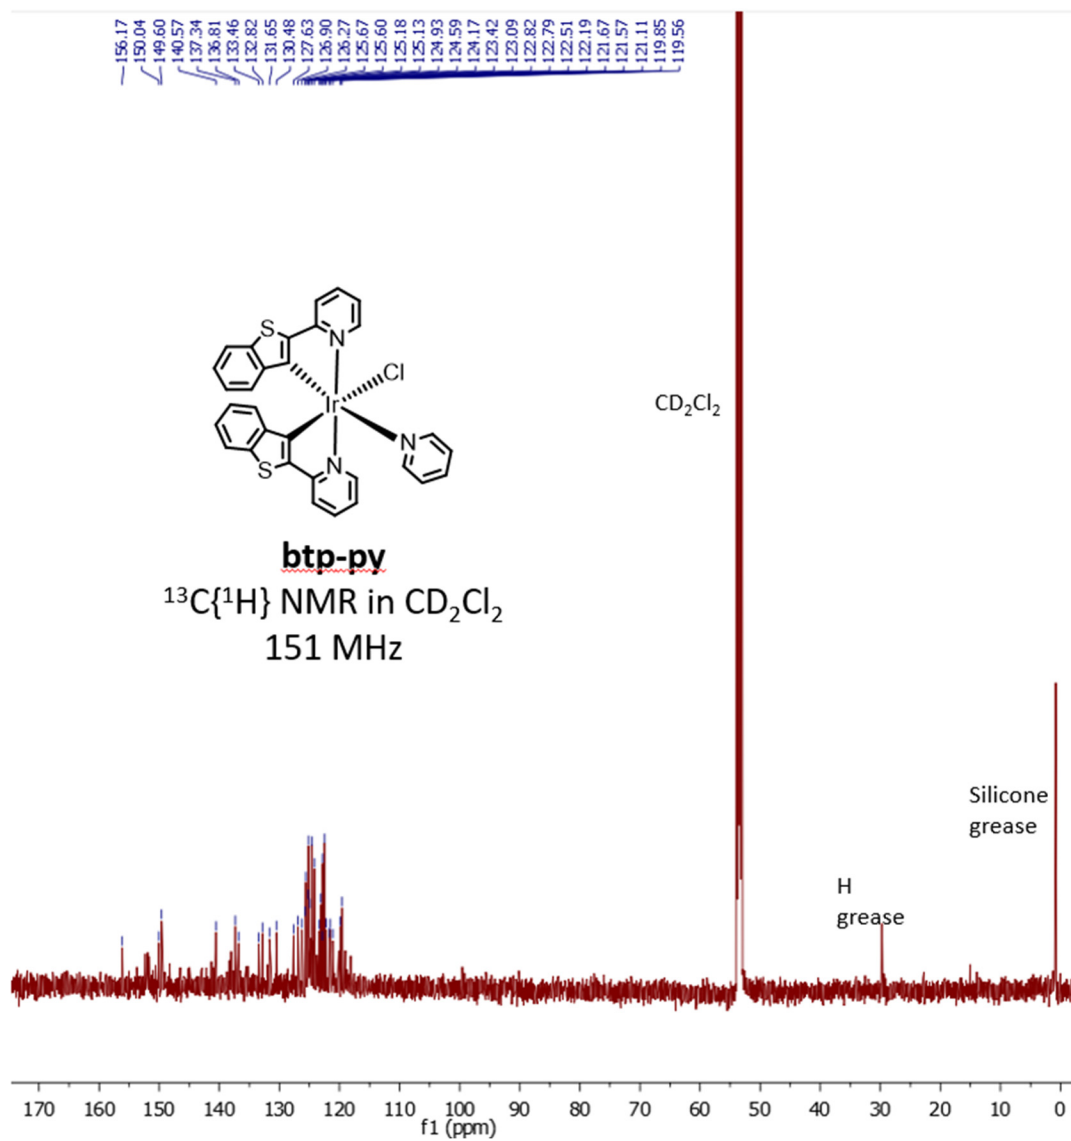

**Fig. S8.**  $^{13}\text{C}\{^1\text{H}\}$  NMR spectrum of **btp-py** recorded at 151 MHz in  $\text{CD}_2\text{Cl}_2$ .

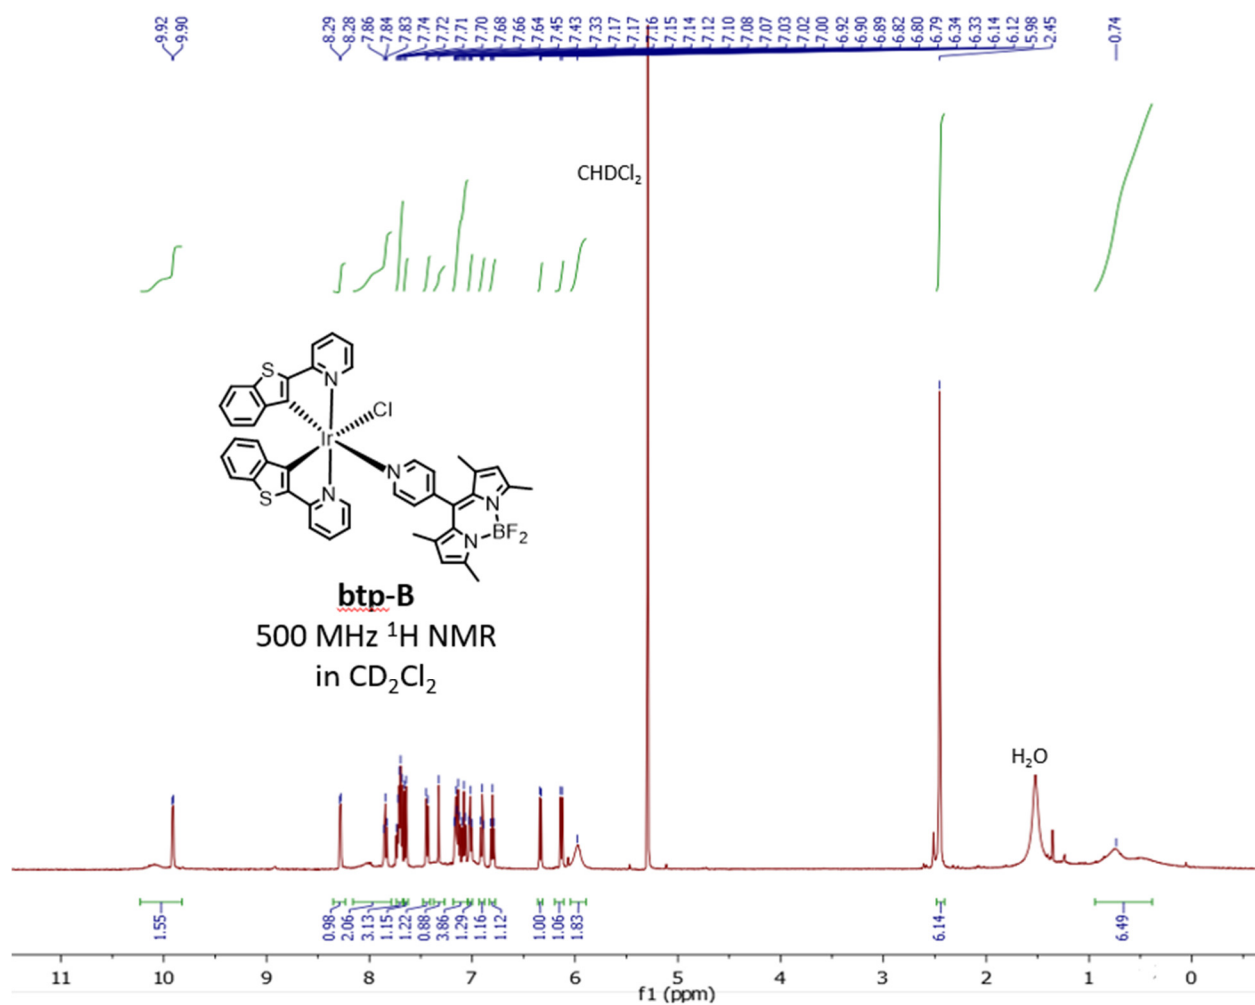

**Fig. S9.**  $^1\text{H}$  NMR spectrum of **btp-B** recorded at 500 MHz in  $\text{CD}_2\text{Cl}_2$ .

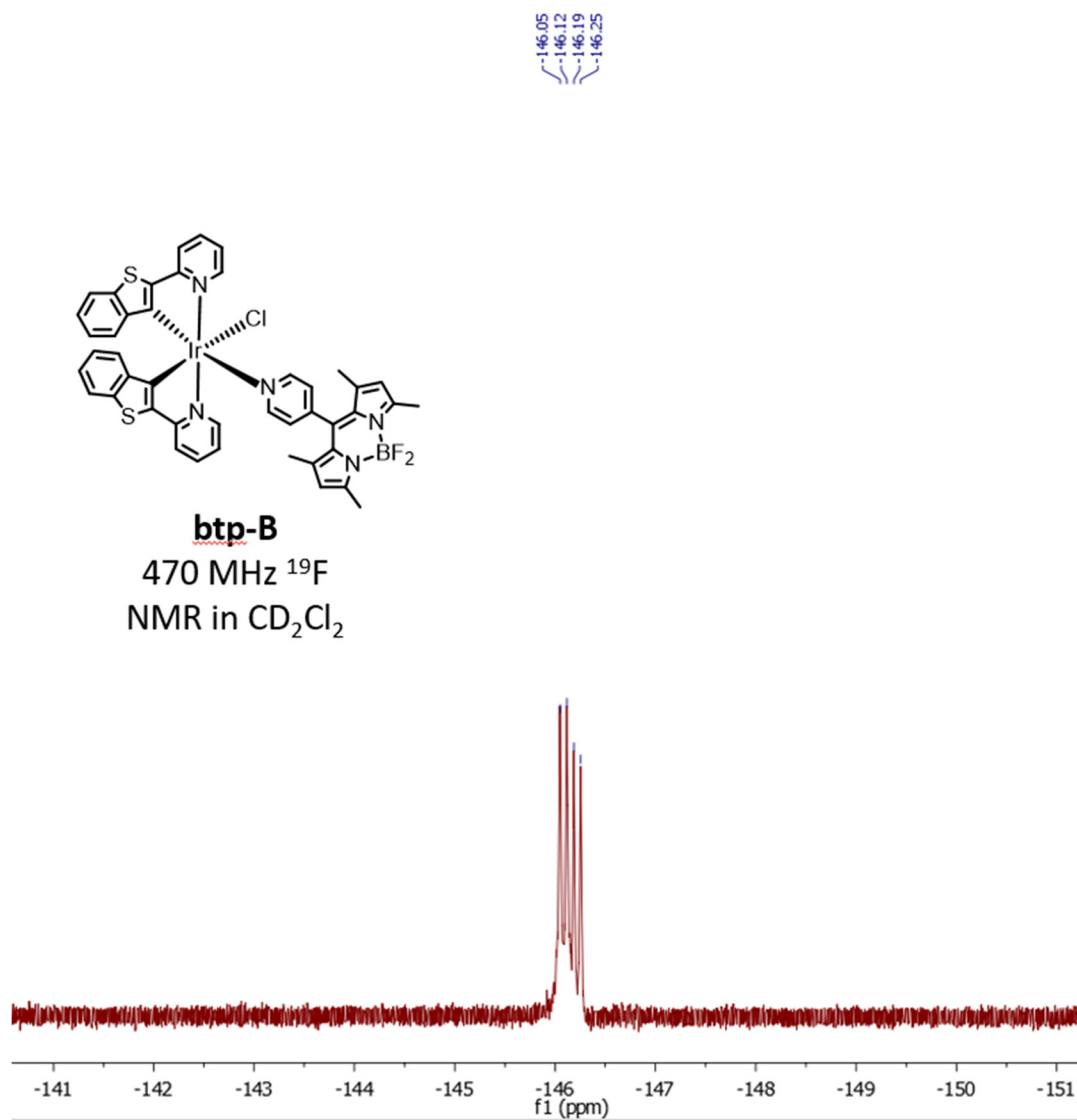

**Fig. S10.**  $^{19}\text{F}$  NMR spectrum of **btp-B** recorded at 470 MHz in  $\text{CD}_2\text{Cl}_2$ .

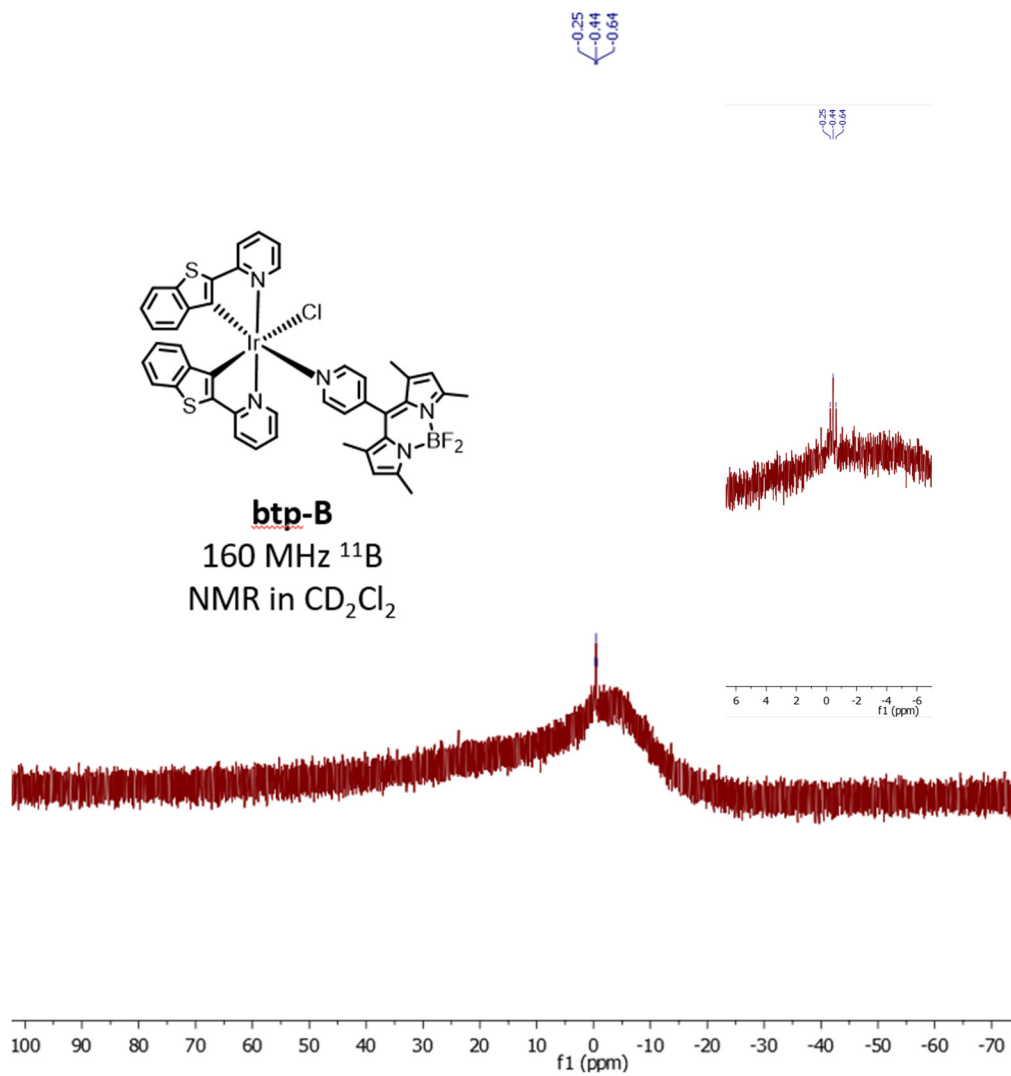

**Fig. S11.** <sup>11</sup>B NMR spectrum of **btp-B** recorded at 160 MHz in CD<sub>2</sub>Cl<sub>2</sub>.

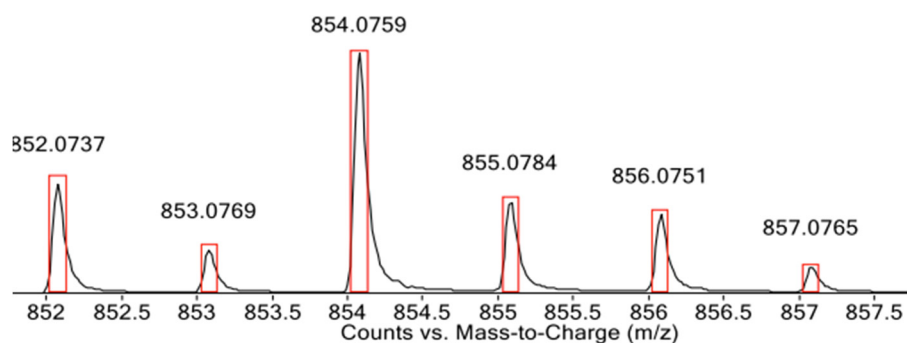

**Fig. S12.** Simulated (red boxes) and experimental (black peaks) ESI-MS data for complex **F<sub>2</sub>ppy-C**, showing the isotropic distribution pattern for the molecular ion peak ( $[M + Na]^+$ ).

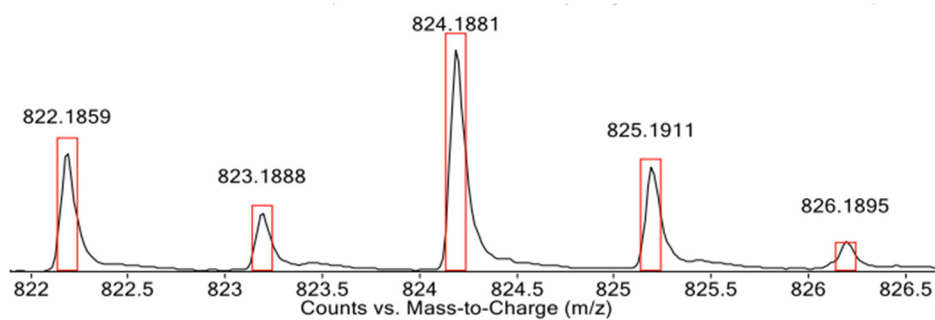

**Fig. S13.** Simulated (red boxes) and experimental (black peaks) ESI-MS data for complex **piq-C**, showing the isotropic distribution pattern for the molecular ion peak ( $[M - Cl]^+$ ).

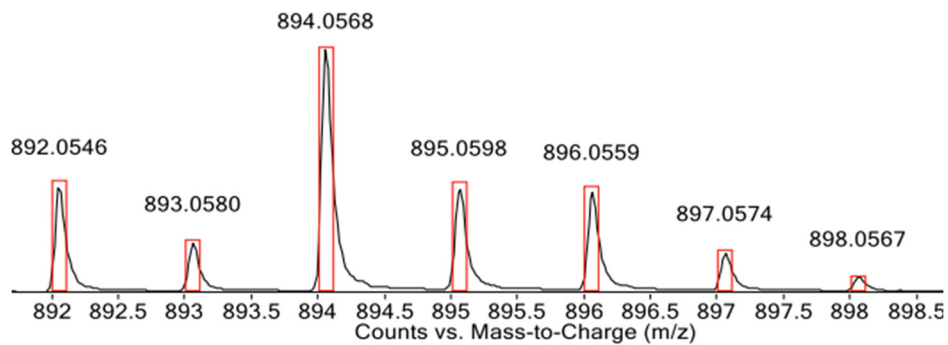

**Fig. S14.** Simulated (red boxes) and experimental (black peaks) ESI-MS data for complex **btp-C**, showing the isotopic distribution pattern for the peak ( $[M + Na]^+$ ).

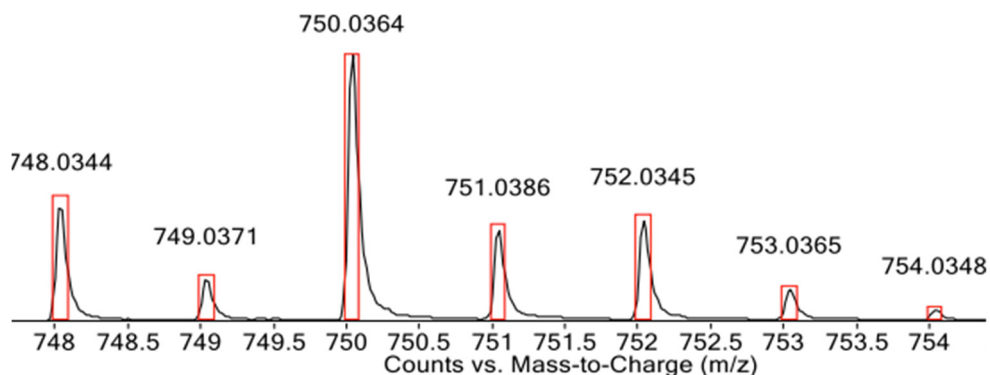

**Fig. S15.** Simulated (red boxes) and experimental (black peaks) ESI-MS data for complex **btp-py**, showing the isotopic distribution pattern for the molecular ion peak ( $[M + Na]^+$ ).

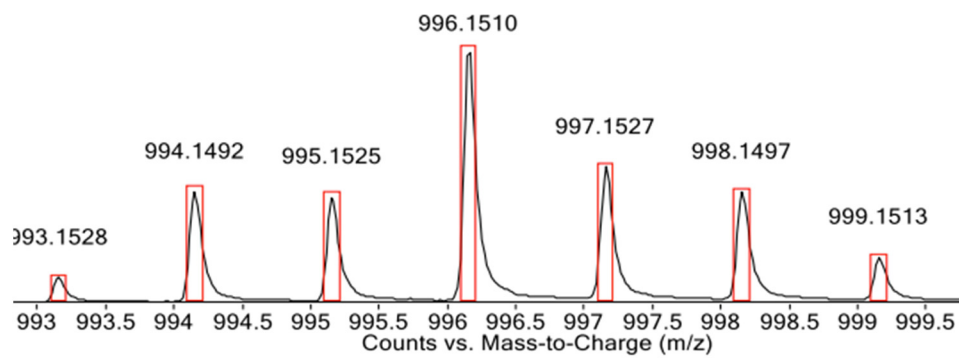

**Fig. S16.** Simulated (red boxes) and experimental (black peaks) ESI-MS data for complex **btp-B**, showing the isotropic distribution pattern for the peak ( $[M + Na]^+$ ).

**Table S1.** Summary of X-ray crystallographic data for **btp-py** and **btp-B**.

|                                                                                                                | <b>btp-py</b>                                                     | <b>btp-B</b> •2C <sub>6</sub> H <sub>6</sub>                                      |
|----------------------------------------------------------------------------------------------------------------|-------------------------------------------------------------------|-----------------------------------------------------------------------------------|
| CCDC                                                                                                           | 2215267                                                           | 2215268                                                                           |
| Crystal data                                                                                                   |                                                                   |                                                                                   |
| Chemical formula                                                                                               | C <sub>31</sub> H <sub>21</sub> ClIrN <sub>3</sub> S <sub>2</sub> | C <sub>56</sub> H <sub>46</sub> BClF <sub>2</sub> IrN <sub>5</sub> S <sub>2</sub> |
| <i>M<sub>r</sub></i>                                                                                           | 727.28                                                            | 1129.56                                                                           |
| Crystal system, space group                                                                                    | Monoclinic, <i>C2/c</i>                                           | Triclinic, <i>P</i> $\bar{1}$                                                     |
| <i>a</i> , <i>b</i> , <i>c</i> (Å)                                                                             | 35.543(8), 9.543(2), 16.994(4)                                    | 10.1377(11), 15.1859(17), 18.717(2)                                               |
| $\alpha$ , $\beta$ , $\gamma$ (°)                                                                              | 90, 114.027(3), 90                                                | 98.632(1), 103.297(1), 100.196(1)                                                 |
| <i>V</i> (Å <sup>3</sup> )                                                                                     | 5265(2)                                                           | 2704.7(5)                                                                         |
| <i>Z</i>                                                                                                       | 8                                                                 | 2                                                                                 |
| $\mu$ (mm <sup>-1</sup> )                                                                                      | 5.36                                                              | 2.64                                                                              |
| Crystal size (mm)                                                                                              | 0.20 × 0.13 × 0.12                                                | 0.33 × 0.25 × 0.17                                                                |
| Data collection                                                                                                |                                                                   |                                                                                   |
| Absorption correction                                                                                          | Empirical (using intensity measurements) <i>SADABS</i>            | Multi-scan <i>SADABS</i>                                                          |
| <i>T<sub>min</sub></i> , <i>T<sub>max</sub></i>                                                                | 0.436, 0.746                                                      | 0.607, 0.746                                                                      |
| No. of measured, independent and observed [ <i>I</i> > 2σ( <i>I</i> )] reflections                             | 25793, 5791, 5024                                                 | 77072, 12477, 11086                                                               |
| <i>R<sub>int</sub></i>                                                                                         | 0.066                                                             | 0.063                                                                             |
| (sin θ/λ) <sub>max</sub> (Å <sup>-1</sup> )                                                                    | 0.641                                                             | 0.651                                                                             |
| Refinement                                                                                                     |                                                                   |                                                                                   |
| <i>R</i> [ <i>F</i> <sup>2</sup> > 2σ( <i>F</i> <sup>2</sup> )], <i>wR</i> ( <i>F</i> <sup>2</sup> ), <i>S</i> | 0.050, 0.137, 1.02                                                | 0.030, 0.084, 1.08                                                                |
| No. of reflections                                                                                             | 5791                                                              | 12477                                                                             |
| No. of parameters                                                                                              | 343                                                               | 618                                                                               |
| No. of restraints                                                                                              | 0                                                                 | 228                                                                               |
| Δρ <sub>max</sub> , Δρ <sub>min</sub> (e Å <sup>-3</sup> )                                                     | 5.81, -3.36                                                       | 1.96, -0.73                                                                       |



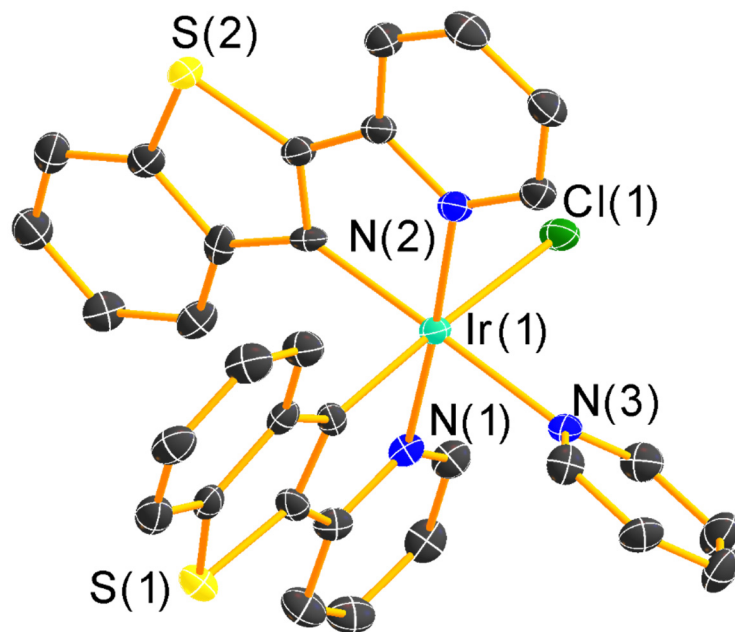

**Fig. S17.** Molecular structures of **btp-py** determined by single-crystal X-ray diffraction. Thermal ellipsoids are drawn at the 50% probability level with hydrogen atoms omitted.

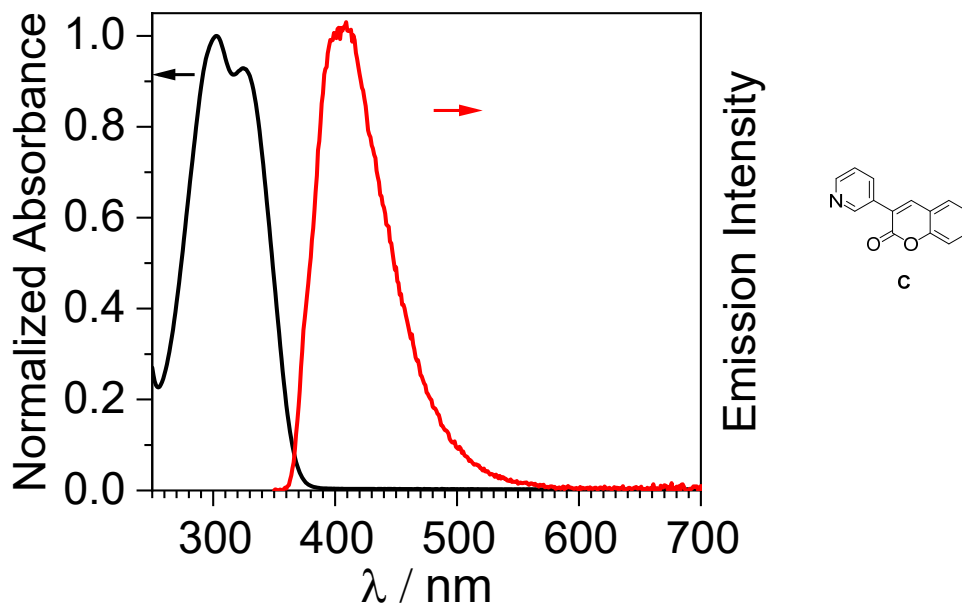

**Fig. S18.** Overlaid UV-vis absorption (solid black line) and photoluminescence (solid red line) spectra of coumarin **C**, recorded at 293 K in  $\text{CH}_2\text{Cl}_2$ . These data were previously reported.<sup>2</sup>

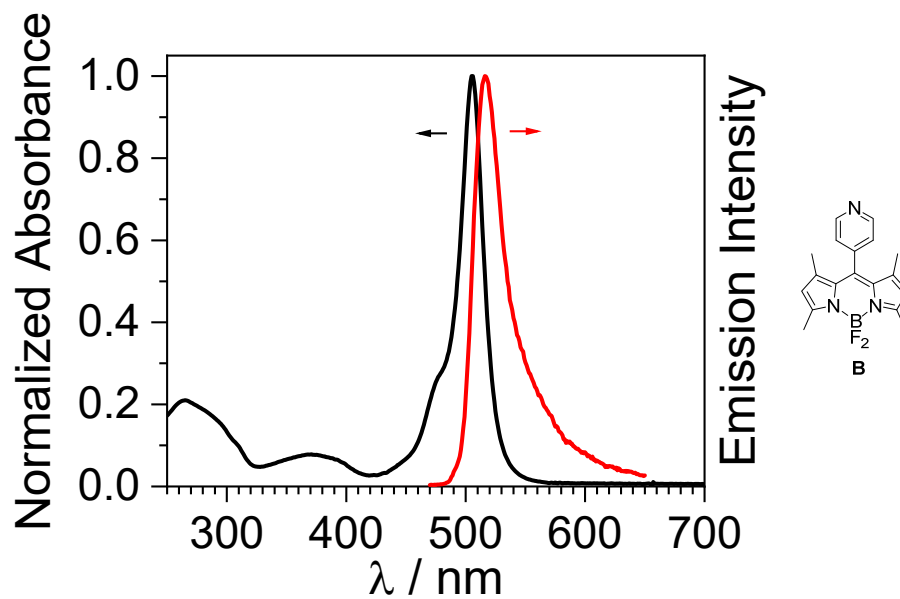

**Fig. S19.** Overlaid UV-vis absorption (black dashed line) and photoluminescence (red solid line) spectra of BODIPY **B**, recorded at 293 K in  $\text{CH}_2\text{Cl}_2$ . These data were previously reported.<sup>3</sup>

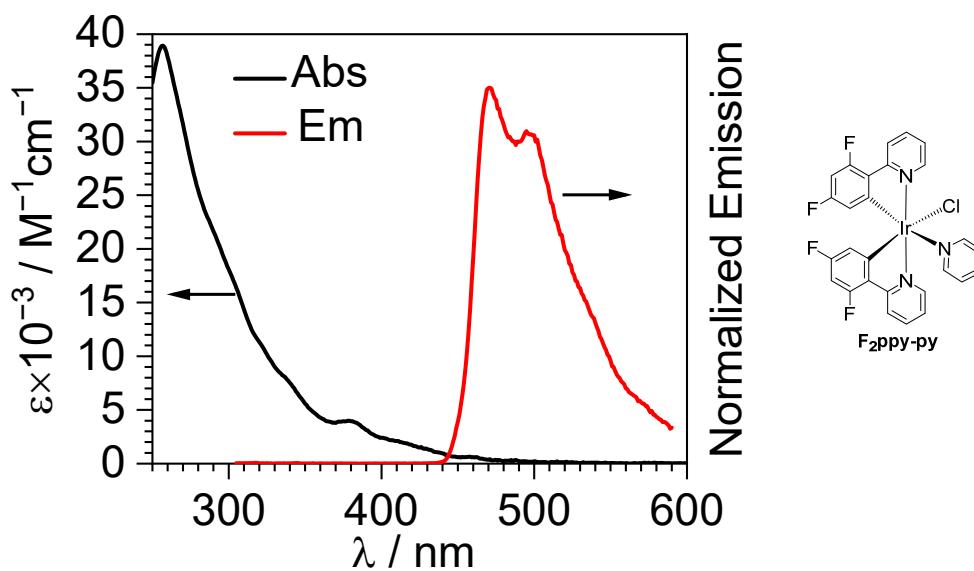

**Fig. S20.** Overlaid UV-vis absorption (solid black line) and photoluminescence (solid red line) spectra of the pyridine model complex **F<sub>2</sub>ppy-py**, recorded in  $\text{CH}_2\text{Cl}_2$  at 293 K. These data were previously reported.<sup>7</sup>

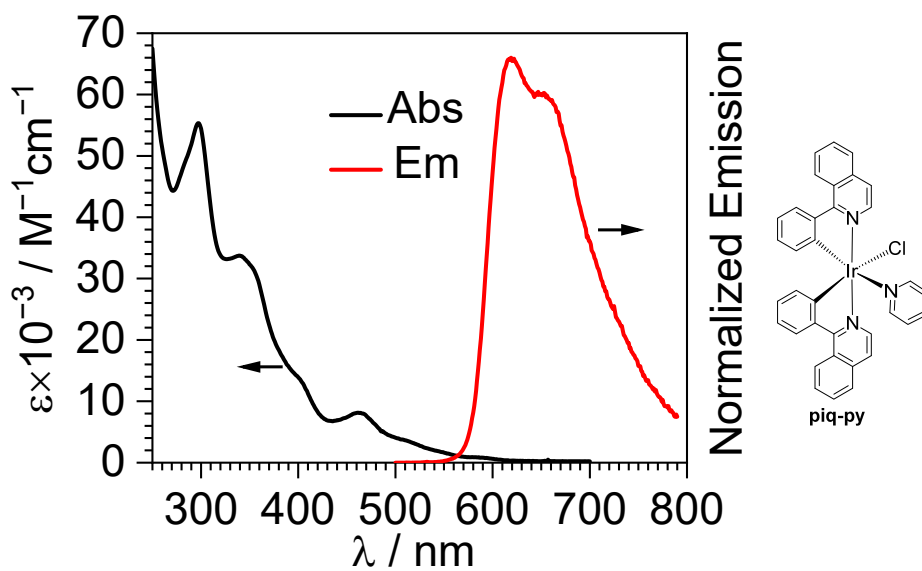

**Fig. S21.** Overlaid UV-vis absorption (solid black line) and photoluminescence (solid red line) spectra of the pyridine model complex **piq-py**, recorded in  $\text{CH}_2\text{Cl}_2$  at 293 K. These data were previously reported.<sup>7</sup>

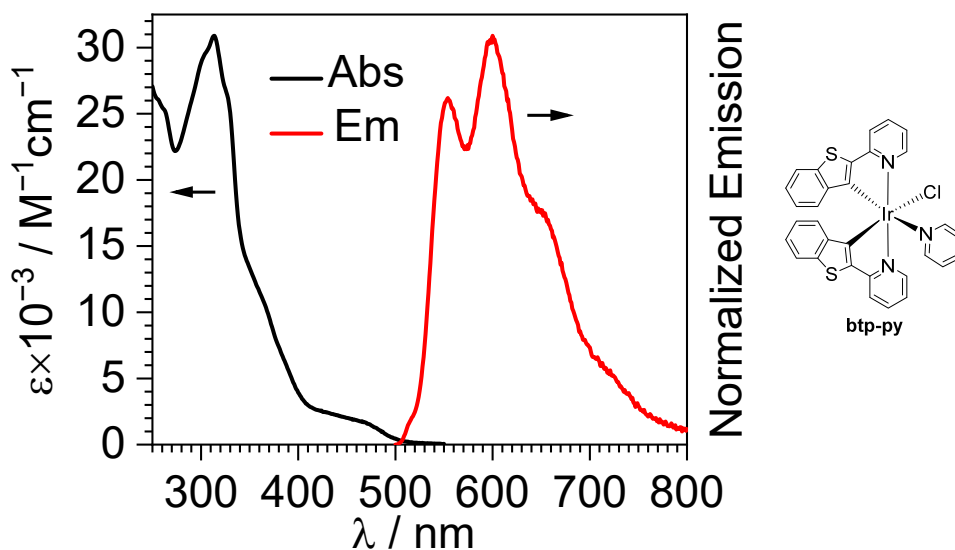

**Fig. S22.** Overlaid UV-vis absorption (solid black line) and photoluminescence (solid red line) spectra of the pyridine model complex **btp-py**, recorded in  $\text{CH}_2\text{Cl}_2$  at 293 K.

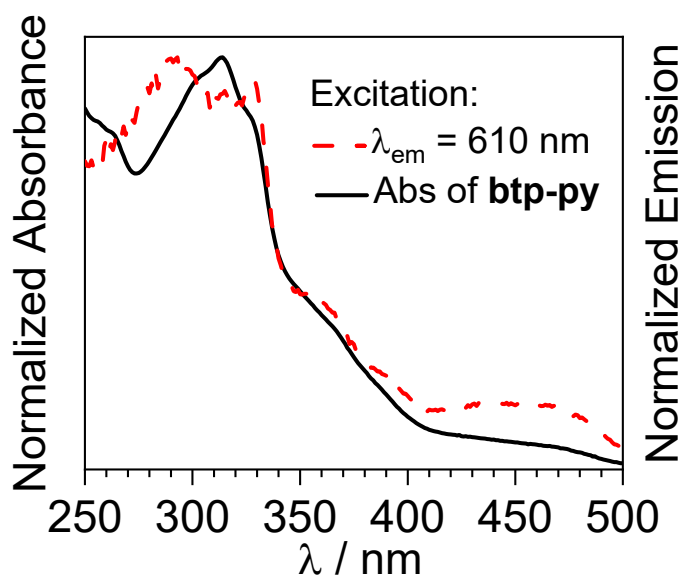

**Fig. S23.** Overlaid UV-vis absorption (black solid line) and excitation (red dashed line) spectra of **btp-py**. The excitation spectrum was monitored at the peak phosphorescence wavelength.

**Table S2.** Summary of photoluminescence data for the free coumarin and BODIPY fluorophores and the pyridine-terminated iridium model complexes. Recorded in  $\text{CH}_2\text{Cl}_2$  at room temperature.

| Compound      | Reference        | $\lambda_{\text{em}}/\text{nm}$ (293 K) | $\Phi_{\text{PL}}$ | $\tau_{\text{PL}}$ |
|---------------|------------------|-----------------------------------------|--------------------|--------------------|
| C             | 2                | 406                                     | 0.083              | 3.4 ns             |
| B             | 3                | 521                                     | 0.30               | 1.9 ns             |
| F2ppy-py      | 7                | 470 <sup>max</sup> , 500(sh), 542(sh)   | 0.06               | 3.5 $\mu\text{s}$  |
| piq-py        | 7                | 619 <sup>max</sup> , 659(sh)            | 0.29               | 2.3 $\mu\text{s}$  |
| <b>btp-py</b> | <i>this work</i> | 554, 600 <sup>max</sup> , 653           | 0.13               | 1.8 $\mu\text{s}$  |

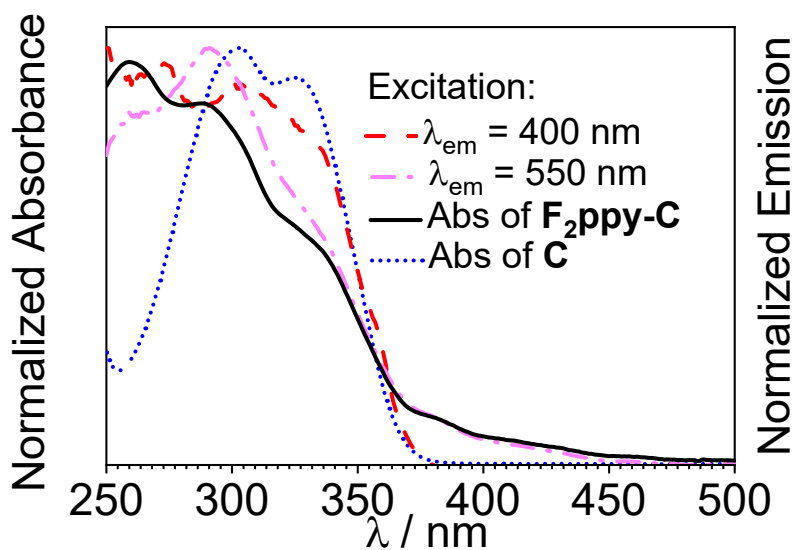

**Fig. S24.** Overlaid UV-vis absorption (black solid line) and excitation spectra of **F<sub>2</sub>ppy-C**. Excitation spectra were monitored at the peak fluorescence (red dashed line) and phosphorescence (magenta dash-dot line) wavelengths. The UV-vis absorption spectrum of coumarin **C** (blue dotted line) is included for reference.

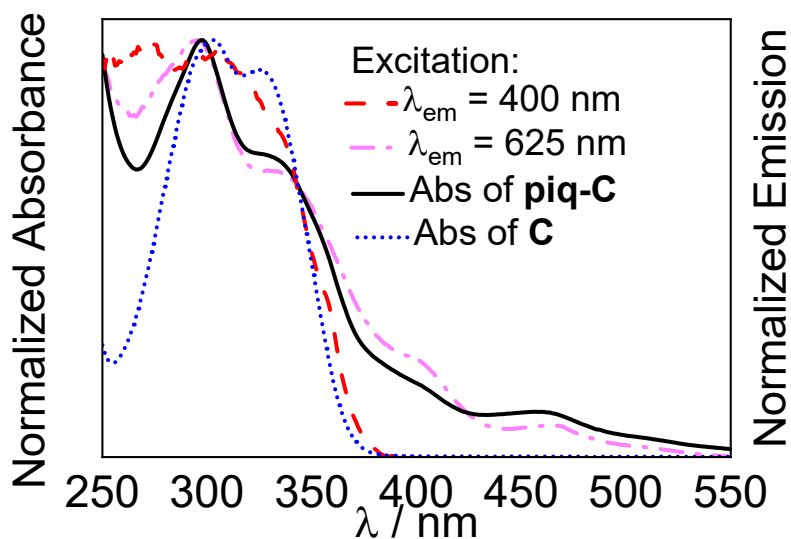

**Fig. S25.** Overlaid UV-vis absorption (black solid line) and excitation spectra of **piq-C**. Excitation spectra were monitored at the peak fluorescence (red dashed line) and phosphorescence (magenta dash-dot line) wavelengths. The UV-vis absorption spectrum of coumarin **C** (blue dotted line) is included for reference.

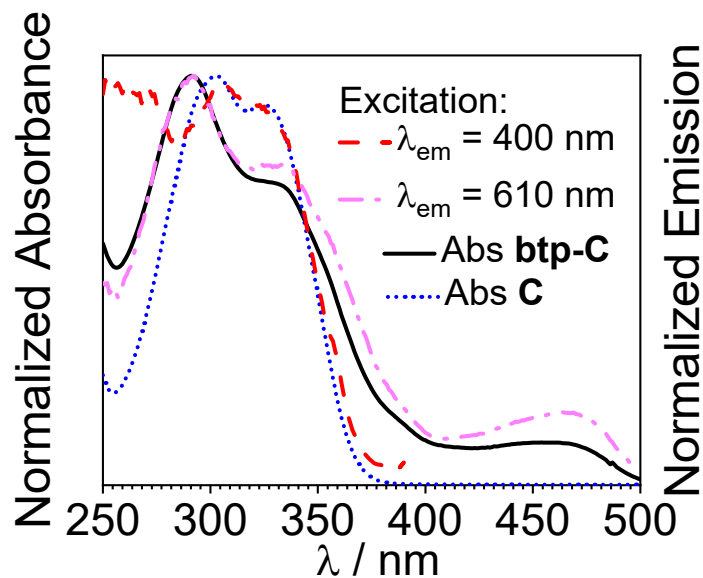

**Fig. S26.** Overlaid UV-vis absorption (black solid line) and excitation spectra of **btp-C**. Excitation spectra were monitored at the peak fluorescence (red dashed line) and phosphorescence (magenta dash-dot line) wavelengths. The UV-vis absorption spectrum of coumarin C (blue dotted line) is included for reference.

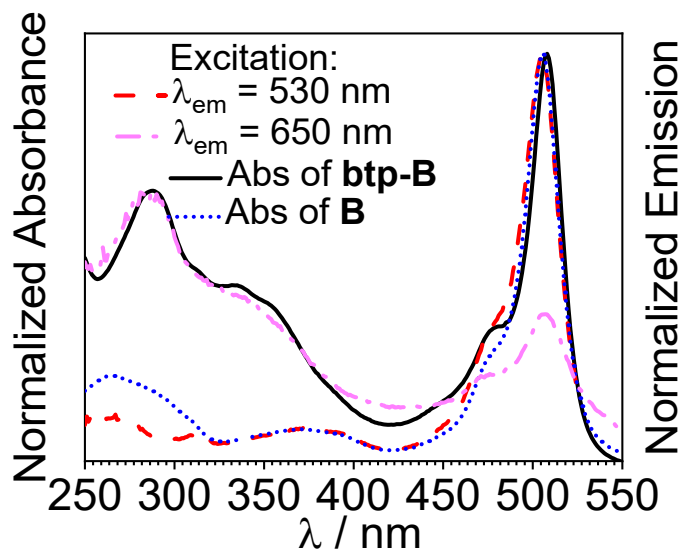

**Fig. S27.** Overlaid UV-vis absorption (black solid line) and excitation spectra of **btp-B**. Excitation spectra were monitored at the peak fluorescence (red dashed line) and phosphorescence (magenta dash-dot line) wavelengths. The UV-vis absorption spectrum of BODIPY B (blue dotted line) is included for reference.

$$\frac{\tau_0}{\tau} = 1 + K_{SV}pO_2 = 1 + k_q\tau_0pO_2 \quad (S1)$$

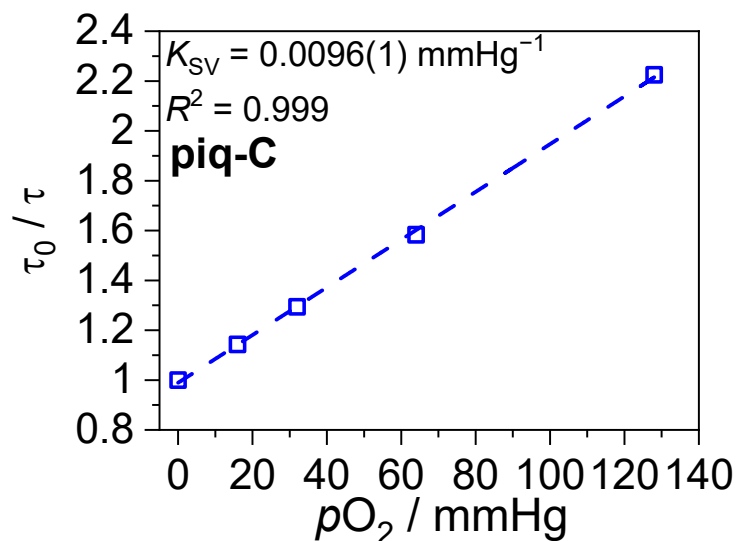

**Fig. S28.** Stern-Volmer plot of **piq-C** determined using the lifetime method (Equation S2). The y-axis of  $\tau_0 / \tau$  denotes the ratio of the lifetime in the absence of oxygen ( $\tau_0$ ) to the lifetime in the presence of oxygen ( $\tau$ ). The parenthetical number in  $K_{SV}$  represents the error in the fit for the last reported digit, and the  $R^2$  value is also provided.

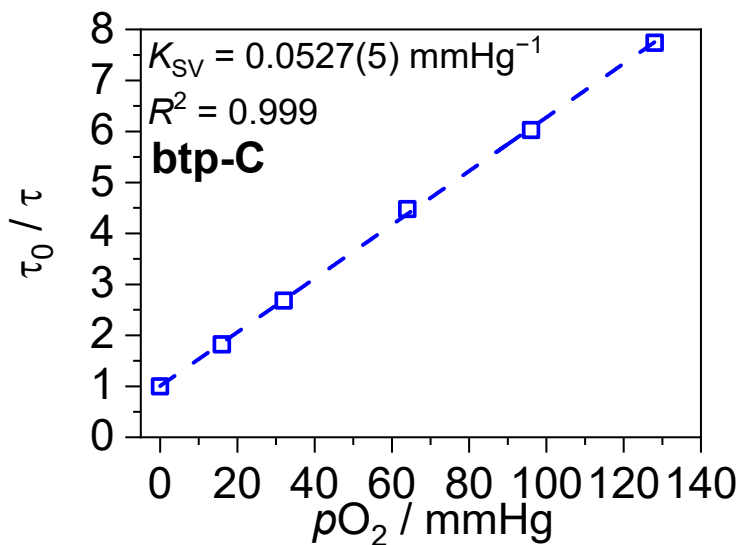

**Fig. S29.** Stern-Volmer plot of **btp-C** determined using the lifetime method (Equation S2). The y-axis of  $\tau_0 / \tau$  denotes the ratio of the lifetime in the absence of oxygen ( $\tau_0$ ) to the lifetime in the presence of oxygen ( $\tau$ ). The parenthetical digit in  $K_{SV}$  represents the error in the fit for the last reported digit, and the  $R^2$  value is also provided.

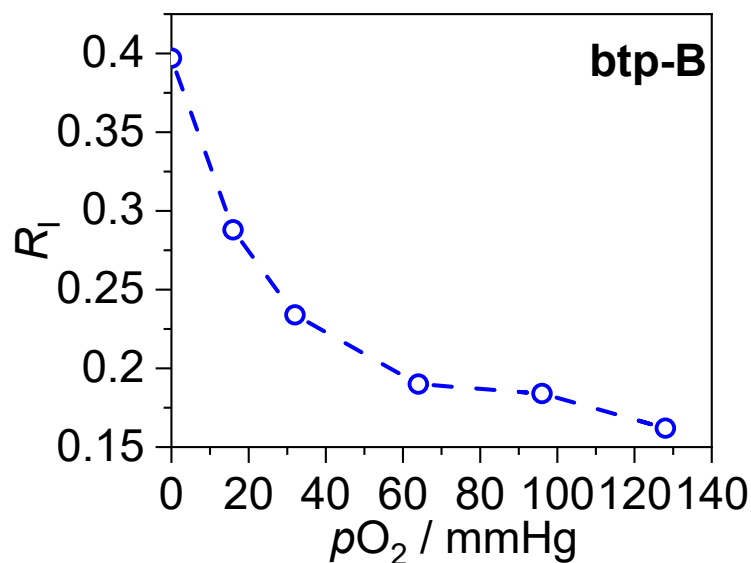

**Fig. S30.** Ratiometric response of complex **btp-B** as a function of oxygen partial pressure. The dotted line is drawn simply as a guide, and the ratio was determined from the emission signals at the peak wavelengths for phosphorescence (603 nm) and fluorescence (524 nm).

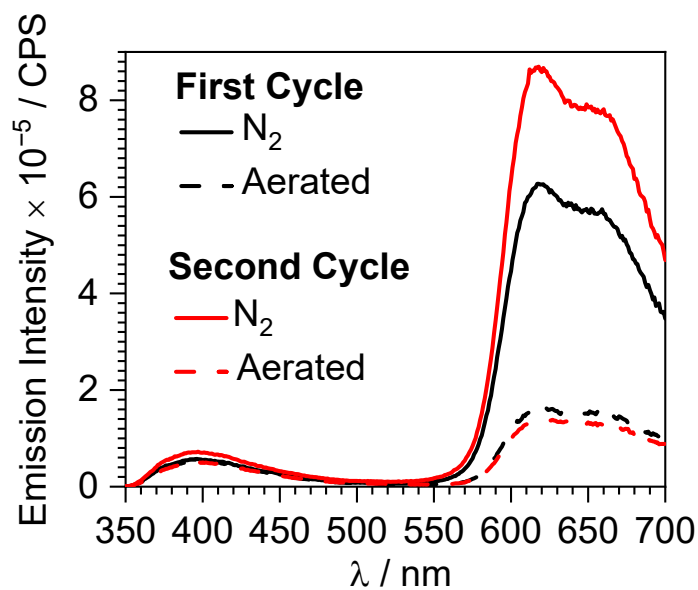

**Fig. S31.** Photoluminescence spectra of **piq-C** with repeated cycling of  $N_2$  and aerobic atmospheres. 1) The initial  $N_2$ -saturated sample was prepared in a nitrogen-filled glovebox using deoxygenated  $CH_2Cl_2$ . 2) The sample was then exposed to air to obtain the aerated spectrum. 3) The aerated sample was deaerated with three freeze-pump-thaw cycles on a Schlenk line, and then added back into the cuvette in the glovebox. This process was repeated to get a total of two cycles.



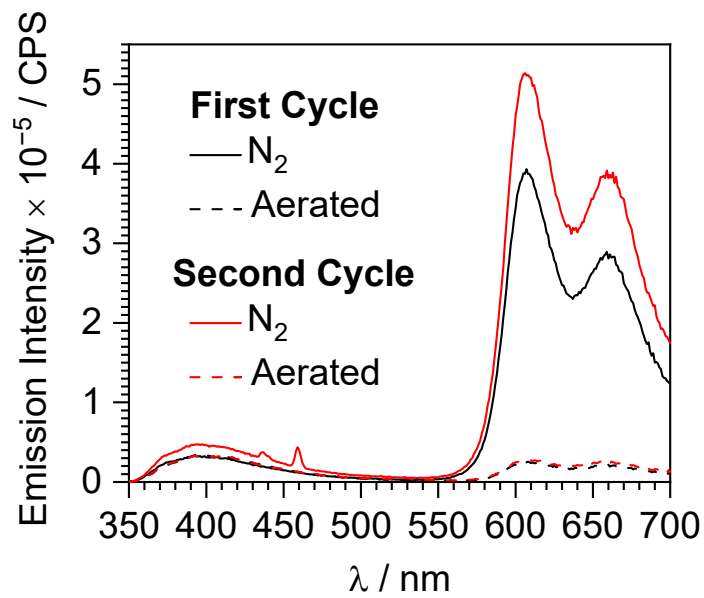

**Fig. S32.** Photoluminescence spectra of **btp-C** with repeated cycling of N<sub>2</sub> and aerobic atmospheres. 1) The initial N<sub>2</sub>-saturated sample was prepared in a nitrogen-filled glovebox using deoxygenated CH<sub>2</sub>Cl<sub>2</sub>. 2) The sample was then exposed to air to obtain the aerated spectrum. 3) The aerated sample was deaerated with three freeze-pump-thaw cycles on a Schlenk line, and then added back into the cuvette in the glovebox. This process was repeated to get a total of two cycles.

## ESI References

- 1 M. Nonoyama, *Bull. Chem. Soc. Jpn.*, 1974, **47**, 767–768.
- 2 Y. Wu, G. D. Sutton, M. D. S. Halamiccek, X. Xing, J. Bao and T. S. Teets, *Chem. Sci.*, 2022, **13**, 8804–8812.
- 3 K. S. Choung, K. Marroquin and T. S. Teets, *Chem. Sci.*, 2019, **10**, 5124–5132.
- 4 F. Vögtle, M. Plevoets, M. Nieger, G. C. Azzellini, A. Credi, L. De Cola, V. De Marchis, M. Venturi and V. Balzani, *J. Am. Chem. Soc.*, 1999, **121**, 6290–6298.
- 5 G. M. Sheldrick, *Acta Crystallogr. Sect. C Struct. Chem.*, 2015, **71**, 3–8.
- 6 A. L. Spek, *Acta Crystallogr. D Biol. Crystallogr.*, 2009, **65**, 148–155.
- 7 C. Jiang and T. S. Teets, *Inorg. Chem.*, 2022, **61**, 8788–8796.
